# Supplementary material for: Impacts of Eccentric Resistance Exercise on DNA Methylation of Candidate Genes for Inflammatory Cytokines in Skeletal Muscle and Leukocytes of Healthy Males
Source: MDPI journal article supplement (doi:10.3390/genes14020478), 2023-02-13
Supplement: s1 [file s1]

**Supplementary Table S1.** Serum concentrations of protein markers associated with inflammation and muscle damage. Data presented as the mean of each trial  $\pm$  standard deviations. LDH; Lactate dehydrogenase, Mb; Myoglobin, CK; Creatine Kinase.

| Marker                   | Trial | Pre-ex             | Post-ex             | Post-ex+3hr         | Post-ex+48hr        |
|--------------------------|-------|--------------------|---------------------|---------------------|---------------------|
| TNF- $\alpha$<br>(pg/mL) | A     | 0.26 $\pm$ 0.25    | 0.23 $\pm$ 0.19     | 0.29 $\pm$ 0.27     | 0.25 $\pm$ 0.22     |
|                          | B     | 0.26 $\pm$ 0.29    | 0.16 $\pm$ 0.13     | 0.21 $\pm$ 0.06     | 0.21 $\pm$ 0.23     |
|                          | C     | 0.12 $\pm$ 0.06    | 0.2 $\pm$ 0.11      | 0.27 $\pm$ 0.32     | 0.30 $\pm$ 0.27     |
| IL-6<br>(pg/mL)          | A     | 0.36 $\pm$ 0.27    | 3.73 $\pm$ 1.8      | 3.4 $\pm$ 2.73      | 2.16 $\pm$ 2.86     |
|                          | B     | 0.5 $\pm$ 0.39     | 2.66 $\pm$ 1.88     | 2.68 $\pm$ 1.15     | 0.66 $\pm$ 0.83     |
|                          | C     | 0.52 $\pm$ 0.19    | 4.91 $\pm$ 4.64     | 2.64 $\pm$ 1.3      | 0.7 $\pm$ 0.68      |
| LDH<br>(U/L)             | A     | 214.74 $\pm$ 71.44 | 238.16 $\pm$ 66.88  | 293.28 $\pm$ 84.59  | 291.44 $\pm$ 114.51 |
|                          | B     | 226.48 $\pm$ 92.25 | 240.49 $\pm$ 85.9   | 259.74 $\pm$ 77.61  | 254.97 $\pm$ 84.96  |
|                          | C     | 226.64 $\pm$ 65.12 | 243.23 $\pm$ 63.16  | 265 $\pm$ 65.04     | 247.95 $\pm$ 67.79  |
| Mb<br>( $\mu$ g/L)       | A     | 42.49 $\pm$ 22.35  | 438.18 $\pm$ 314.56 | 549.96 $\pm$ 399.67 | 364.14 $\pm$ 611.31 |
|                          | B     | 35.31 $\pm$ 11.26  | 201.43 $\pm$ 121.66 | 210.97 $\pm$ 134.8  | 34.23 $\pm$ 11.81   |
|                          | C     | 58.35 $\pm$ 72.42  | 214.03 $\pm$ 126.92 | 225.1 $\pm$ 114.79  | 32.02 $\pm$ 9.15    |
| CK<br>(U/L)              | A     | 140.88 $\pm$ 26.47 | 280.69 $\pm$ 115.18 | 610.14 $\pm$ 424.22 | 889.98 $\pm$ 714.5  |
|                          | B     | 163.38 $\pm$ 65.72 | 264.35 $\pm$ 111.26 | 397.45 $\pm$ 200.04 | 429.48 $\pm$ 220.21 |
|                          | C     | 144.5 $\pm$ 49     | 281.31 $\pm$ 118.28 | 431.61 $\pm$ 218.18 | 440.04 $\pm$ 234.83 |

**Supplementary Table S2.** Methylation of skeletal muscle and leukocytes at baseline (Trial A, Pre-ex).  $p < 0.05$  indicates a significant difference between tissues. Data presented as mean  $\pm$  SD.

| CpG Site   | Tissue          | Methylation (%) | p      |
|------------|-----------------|-----------------|--------|
| <i>TNF</i> |                 |                 |        |
| CpG1       | Skeletal Muscle | 30.82 ± 5.11    | <0.001 |
|            | Leukocytes      | 13.17 ± 2.70    |        |
| CpG2       | Skeletal Muscle | 25.03 ± 3.88    | <0.001 |
|            | Leukocytes      | 10.53 ± 2.5     |        |
| CpG3       | Skeletal Muscle | 30.41 ± 3.17    | <0.001 |
|            | Leukocytes      | 12.62 ± 3.42    |        |
| CpG4       | Skeletal Muscle | 50.87 ± 5.64    | <0.001 |
|            | Leukocytes      | 14.65 ± 3.31    |        |
| CpG Mean   | Skeletal Muscle | 34.28 ± 4.38    | <0.001 |
|            | Leukocytes      | 12.74 ± 2.58    |        |
| <i>IL6</i> |                 |                 |        |
| CpG1       | Skeletal Muscle | 72.41 ± 6.93    | 0.002  |
|            | Leukocytes      | 91.10 ± 1.92    |        |
| CpG2       | Skeletal Muscle | 76.87 ± 4.46    | <0.001 |

|          |                 |              |        |
|----------|-----------------|--------------|--------|
| CpG3     | Leukocytes      | 91.12 ± 1.19 | 0.008  |
|          | Skeletal Muscle | 82.94 ± 3.97 |        |
| CpG4     | Leukocytes      | 91.17 ± 3.09 | <0.001 |
|          | Skeletal Muscle | 66.08 ± 5.03 |        |
| CpG5     | Leukocytes      | 88.89 ± 1.95 | 0.007  |
|          | Skeletal Muscle | 72.23 ± 4.03 |        |
| CpG6     | Leukocytes      | 82.01 ± 3.58 | <0.001 |
|          | Skeletal Muscle | 74.09 ± 5.38 |        |
| CpG Mean | Leukocytes      | 88.99 ± 2.3  | <0.001 |
|          | Skeletal Muscle | 74.10 ± 4.14 |        |
|          | Leukocytes      | 88.87 ± 1.42 | <0.001 |
|          | Skeletal Muscle | 74.10 ± 4.14 |        |

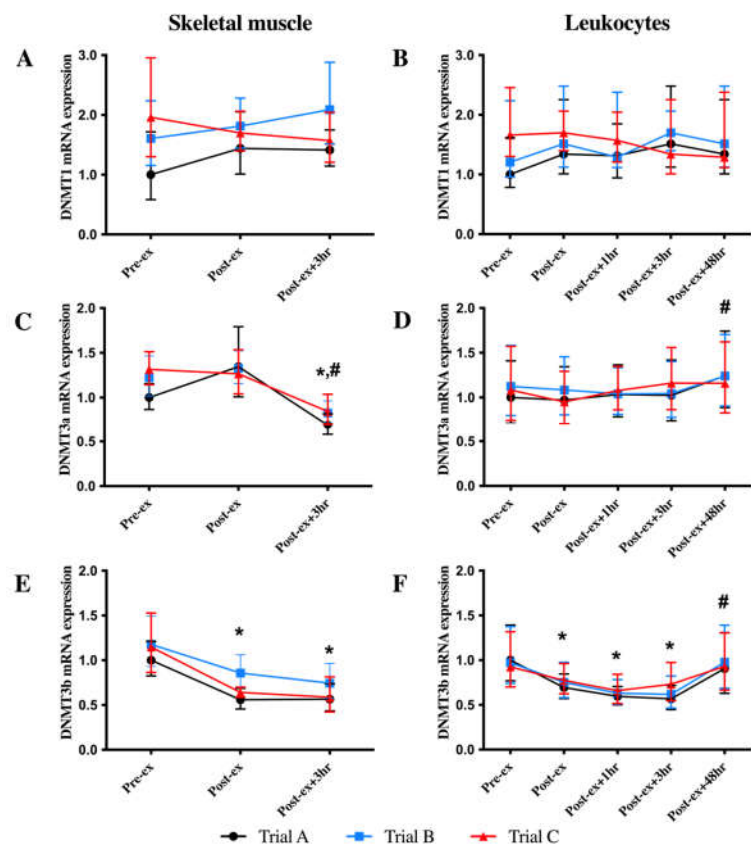

**Supplementary Figure S1.** Effect of exercise on the mRNA expression of (A&B) DNMT1, (C&D) DNMT3a and (E&F) DNMT3b in skeletal muscle (left-hand column) and leukocytes (right-hand column). \*Indicates significantly different from Pre-ex; # indicates significantly different from Post-ex.
